# Supplementary material
Source: publisher figshare collection journal article supplement (https://tandf.figshare.com/ndownloader/files/28386328)
Supplement: Supplementary file 1 [file 28386328]

| Systematics | Genus (currently accepted) | Species (currently accepted) | Genus (original name) | Species (original name) | First mentioned for the Barents Sea |
| --- | --- | --- | --- | --- | --- |
| Class Demospongiae (Sollas, 1885)   Subclass Heteroscleromorpha (Cárdenas, Pérez & Boury-Esnault, 2012)   Order Haplosclerida (Topsent, 1928)   Family Chalinidae (Gray, 1867) |  |  |  |  |  |
|  | *Haliclona* | *tromsoica* (Hentschel, 1929) | *Reniera* | *tromsoica* (Hentschel, 1929) | Hentschel, 1929 |
|  | *Haliclona* | *tenera* (Marenzeller, 1878) | *Halichondria* | *tenera* (Marenzeller, 1878) | Marenzeller, 1878 |
|  | *Haliclona* | *groenlandica*(Fristedt, 1887) | *Chalina* | *groenlandica* (Fristedt, 1887) | Breitfuss, 1912 |
|  | *Haliclona* | *rossica* (Hentschel, 1929) | *Reniera* | *rossica* (Hentschel, 1929) | Hentschel, 1929 |
|  | *Haliclona* | *oculata* (Linnaeus, 1759) | *Haliclona* | *gracilis* (Miklucho-Maclay, 1870) | Koltun, 1959 |
|  | *Haliclona* | *cinerea* (Grant, 1826) | *Raniera* | *cinerea* (Grant, 1826) | Hentschel, 1929 |
|  | *Haliclona* | *urceolus* (Rathke & Vahl, 1806) | *Reniera* | *urceolus* (Rathke & Vahl, 1806) | Hentschel, 1929 |
|  | *Haliclona* | *tenuiderma* (Lundbeck, 1902) | *Halichondria* | *tenuiderma* (Lundbeck, 1902) | Breitfuss, 1912 |
|  | *Haliclona* | *mollicula* (Lundbeck, 1902) | *Siphonochalina* | *mollicula* (Lundbeck, 1902) | Hentschel, 1929 |
|  | *Haliclona* | *gracilis* (Miklucho-Maclay, 1870) | *Haliclona* | *gracilis* (Miklucho-Maclay, 1870) | Koltun, 1959 |
|  | *Haliclona* | *porosa* (Fristedt, 1887) | *Gellius* | *porosus* (Fristedt, 1887) | Hentschel, 1916 |
|  | *Haliclona* | *flagellifera*(Ridley & Dendy, 1886) | *Gellius* | *flagellifer* (Ridley & Dendy, 1886) | Koltun, 1959 |
|  | *Haliclona* | *rosea*(Bowerbank, 1866) | *Reniera* | *tubulosa* (Fristedt, 1887) | Breitfuss, 1912; Koltun, 1959 (as *Haliclona aquaeductus,* Schmidt 1862)? |
|  | *Haliclona* | *spitzbergensis* (Hentschel, 1916) | *Reniera* | *spitzbergensis* (Hentschel, 1916) | Hentschel, 1916 |
|  | *Haliclona* | *varia* (Lundbeck, 1909) | *Gellius* | *varius* (Lundbeck, 1909) | Koltun, 1959 |
|  | *Haliclona* | foliacea (Miklucho-Maclay, 1870) | *Veluspa* | *polymorpha* var. *foliacea*(Miklucho Maclay, 1870) | Miklucho Maclay, 1870 |
|  | *Haliclona* | *angulata* (Bowerbank, 1866) | *Gellius* | *angulatus* (Lundbeck, 1902) | Koltun, 1959 |
|  | *Haliclona* | *arctica* (Hentschel, 1916) | *Gellius* | *arcticus* (Hentschel, 1916) | Hentschel, 1916 |
|  | *Haliclona* | *glacialis*(Hentschel, 1916) | *Reniera* | *glacialis* (Hentschel, 1916) | Hentschel, 1916 |
|  | *Haliclona* | *ernsti* (Van Soest & Hooper, 2020) | *Gellius* | *arcticus* (Hentschel, 1916) | Hentschel, 1916 |
|  | *Cladocroce* | *ventilabrum* (Fristedt, 1887) | *Reniera* | *ventilabrum* (Fristedt, 1887) | Fristedt, 1887 |
| Family Niphatidae (van Soest, 1980) |  |  |  |  |  |
|  | *Hemigellius* | *hartlaubi* (Hentschel, 1929) | *Gellius* | *hartlaubi* (Hentschel, 1929) | Hentschel, 1929 |
|  | *Hemigellius* | *arcofer* (Vosmaer, 1885) | *Gellius* | *arcoferus* (Vosmaer, 1885) | Vosmaer, 1885; Koltun, 1959 (as *Gellius jugosus*, Bowerbank 1866)? |
|  | *Hemigellius* | *porosus* (Fristedt, 1887) | *Gellius* | *porosus* (Fristedt, 1887) | Hentschel, 1916 |
|  | *Pachychalina* | *arctica* (Miklucho-Maclay, 1870) | *Veluspa* | *polymorpha* var. *arctica*(Miklucho Maclay, 1870) | Miklucho Maclay, 1870 |
|  | *Pachychalina* | *fracta* (Hentschel, 1929) | *Pachychalina* | *fracta* (Hentschel, 1929) | Hentschel, 1929 |
| Family Iotrochotidae (Dendy, 1922) |  |  |  |  |  |
|  | *Iotroata* | *rotulancora* (Lundbeck, 1905) | *Iotrochota* | *rotulancora* (Lundbeck, 1905) | Koltun, 1959 |
|  | *Iotroata* | *dubia* (Lundbeck, 1905) | *Iotrochota* | *dubia* (Lundbeck, 1905) | Hentschel, 1929 |
| Order Axinellida (Lévi, 1953)  Family Axinellidae Carter, 1875 |  |  |  |  |  |
|  | *Axinella* | *arctica* (Vosmaer, 1885) | *Phakellia* | *arctica* (Vosmaer, 1885) | Vosmaer, 1885 |
|  | *Axinella* | *trichophora* (Hentschel, 1929) | *Axinella* | *arctica* var. *trichophora* (Hentschel, 1929) | Hentschel, 1929 |
|  | *Axinella* | *setosa* (Hentschel, 1929) | *Axinella* | *arctica* var. *setosa* (Hentschel, 1929) | Hentschel, 1929 |
|  | *Axinella* | *rugosa* (Bowerbank, 1866) | *Axinella* | *rugosa* (Bowerbank, 1866) | Hentschel, 1929 |
|  | *Phakellia* | *robusta* (Bowerbank, 1866) | *Phakellia* | *robusta* (Bowerbank, 1866) | Hentschel, 1929 |
|  | *Phakellia* | *ventilabrum* (Linnaeus, 1767) | *Phakellia* | *ventilabrum* (Bowerbank, 1866) | Vosmaer, 1885 |
|  | *Phakellia* | *bowerbanki* (Vosmaer, 1885) | *Phakellia* | *bowerbanki* (Vosmaer, 1885) | Vosmaer, 1885 |
| Family Raspailiidae (Nardo, 1833) |  |  |  |  |  |
|  | *Eurypon* | *spitzbergense* (Fristedt, 1887) | *Hymeraphia* | *spitzbergensis* (Fristedt, 1887) | Fristedt, 1887 |
|  | *Hymeraphia* | *stellifera* (Bowerbank, 1864) | *Mesapos* | *stellifera* (Bowerbank, 1864) | Breitfuss, 1912 |
|  | *Janulum* | *spinispiculum* (Carter, 1876) | *Metschnikowia* | *spinispiculum* (Carter, 1876) | Hentschel, 1929 |
| Family Stelligeridae (Lendenfeld, 1898) |  |  |  |  |  |
|  | *Halicnemia* | *verticillata* (Bowerbank, 1866) | *Hymeraphia* | *verticillata* (Bowerbank, 1866) | Fristedt, 1887 |
| Order Desmacellida (Morrow & Cárdenas, 2015)   Family Desmacellidae (Ridley & Dendy, 1886) |  |  |  |  |  |
|  | *Desmacella* | *infundibuliformis* (Vosmaer, 1885) | *Gellius* | *infundibuliformis* (Vosmaer, 1885) | Vosmaer, 1885 |
| Order Suberitida (Chombard & Boury-Esnault, 1999)  Family Halichondriidae (Gray, 1867) |  |  |  |  |  |
|  | *Halichondria* | *oblonga* (Hansen, 1885) | *Haliclona* | *oblonga* (Hansen, 1885) | Koltun, 1959 |
|  | *Halichondria* | *sitiens* (Schmidt, 1870) | *Eumastia* | *sitiens* (Schmidt, 1870) | Fristedt, 1887 |
|  | *Halichondria* | *arenosa* (Hentschel, 1929) | Halichondria | *arenosa* (Hentschel, 1929) | Hentschel, 1929 |
|  | *Halichondria* | *labiata* (Hentschel, 1929) | Halichondria | *labiata* (Hentschel, 1929) | Hentschel, 1929 |
|  | *Halichondria* | *heterorrhaphis* (Breitfuss, 1912) | Halichondria | *heterorrhaphis* (Breitfuss, 1912) | Breitfuss, 1912 |
|  | *Halichondria* | *panicea* (Pallas, 1766) | *Halichondria* | *panicea* (Pallas, 1766) | Fristedt, 1887 |
|  | *Hymeniacidon* | *fasciculata* (Fristedt, 1887) | *Amorphina* | *fasciculata* (Fristedt, 1887) | Fristedt, 1887 |
|  | *Hymeniacidon* | *perlevis*(Montagu, 1814) | *Hymeniacidon* | *caruncula* (Bowerbank, 1858) | Hentschel, 1929 |
|  | *Hymeniacidon* | *assimilis*(Levinsen, 1887) | *Hymeniacidon* | *assimilis*(Levinsen, 1887) | Koltun, 1959 |
|  | *Topsentia* | *fibrosa* (Fristedt, 1887) | *Halichondria* | *fibrosa* (Fristedt, 1887) | Hentschel, 1929 |
|  | *Vosmaeria* | *crustacea* (Fristedt, 1885) | *Inflatella* | *sp.* (Vosmaer, 1885) | Vosmaer, 1885 |
| Family Stylocordylidae (Topsent, 1892) |  |  |  |  |  |
|  | *Stylocordyla* | *borealis* (Lovén, 1868) | *Stylocordyla* | *borealis* (Lovén, 1868) | Vosmaer, 1885 |
| Family Suberitidae (Schmidt, 1870) |  |  |  |  |  |
|  | *Suberites* | *montalbidus* (Carter, 1880) | *Suberites* | *sp.* (Vosmaer, 1882) | Vosmaer, 1882; Koltun, 1966 (as *S. domuncula ficus*,Johnston 1842)? |
|  | *Suberites* | *spermatozoon* (Schmidt, 1875) | *Ficulina* | *ficus* var. *spermatozoon* (Schmidt, 1875) | Rezvoi, 1928 |
|  | *Suberites* | *carnosus* (Johnston, 1842) | *Suberites* | *sp.* (Vosmaer, 1885) | Vosmaer, 1885 |
|  | *Suberites* | *virgultosus* (Johnston, 1842) | *Ficulina* | *luetkeni* (Schmidt, 1870) | Hentschel, 1929 |
|  | *Pseudosuberites* | *montiniger* (Carter, 1880) | *Suberites* | *montiniger* (Carter, 1880) | Carter, 1880 |
|  | *Pseudosuberites* | *hyalinus* (Ridley & Dendy, 1886) | *Pseudosuberites* | *hyalinus* (Ridley & Dendy, 1886) | Topsent, 1913; Koltun, 1966 |
|  | *Rhizaxinella* | *schaudinni* (Hentschel, 1929) | *Rhizaxinella* | *schaudinni* (Hentschel, 1929) | Hentschel, 1929 |
| Order Polymastiida (Morrow & Cárdenas, 2015)   Family Polymastiidae (Gray, 1867) |  |  |  |  |  |
|  | *Polymastia* | *arctica* (Merejkowsky, 1878) | Polymastia | *arctica* (Merejkowsky, 1878) | Plotkin, 2004 |
|  | *Polymastia* | *thielei* (Koltun, 1964) | *Polymastia* | *thielei* (Koltun, 1964) | Koltun, 1966 |
|  | *Polymastia* | *grimaldii* (Topsent, 1913) | *Polymastia* | *mamillaris* var. *hyperborea* (Hentschel, 1916) | Hentschel, 1916 |
|  | *Polymastia* | *nivea* (Hansen, 1885) | *Polymastia* | *nivea* (Hansen, 1885) | Plotkin, 2018 |
|  | *Polymastia* | *boletiformis* (Lamarck, 1815) | *Euplectella* | *robusta* (Bowerbank, 1861) | Topsent, 1913 |
|  | *Polymastia* | *hemisphaerica* (Sars, 1872) | *Polymastia* | *hemisphaerica* (Sars, 1872) | Vosmaer, 1885 |
|  | *Polymastia* | *uberrima* (Schmidt, 1870) | *Polymastia* | *uberrima* (Schmidt, 1870) | Hentschel, 1929 |
|  | *Spinularia* | *sarsii* (Ridley & Dendy, 1886) | *Polymastia* | *sol* (Koltun, 1964) | Koltun, 1964 |
|  | *Quasillina* | *brevis* (Bowerbank, 1861) | *Quasillina* | *brevis* (Bowerbank, 1861) | Vosmaer, 1885 |
|  | *Radiella* | *hemisphaerica* (Sars, 1872) | *Polymastia* | *hemisphaerica* (Sars, 1872) | Vosmaer, 1885 |
|  | *Tentorium* | *semisuberites* (Schmidt, 1870) | *Thecophora* | *semisuberites* (Schmidt, 1870) | Vosmaer, 1885 |
|  | *Sphaerotylus* | *capitatus* (Vosmaer, 1885) | *Polymastia* | *capitata* (Vosmaer, 1885) | Vosmaer, 1885 |
|  | *Sphaerotylus* | *borealis* (Swartschewsky, 1906) | *Sphaerotylus* | *borealis* (Swartschewsky, 1906) | Rezvoi, 1928 |
|  | *Weberella* | *bursa* (Müller, 1806) | *Weberella* | *bursa* (Müller, 1806) | Vosmaer, 1885 |
| Order Tetractinellida (Marshall, 1876)  Suborder Astrophorina (Sollas, 1887)   Family Geodiidae (Gray, 1867) |  |  |  |  |  |
|  | *Geodia* | *hentscheli* (Cárdenas, Rapp, Schander & Tendal, 2010) | *Sidonops* | *mesotriaena* (Hentschel, 1929) | Hentschel, 1929 |
|  | *Geodia* | *phlegraei* (Sollas, 1880) | *Isops* | *pyriformis*; *sphaeroides*; *pallida* (Vosmaer, 1882) | Vosmaer, 1882 |
|  | *Geodia* | *macandrewii* (Bowerbank, 1858) | *Geodia* | *macandrewii* (Bowerbank, 1858) | Koltun, 1966 |
|  | *Geodia* | *barretti* (Bowerbank, 1858) | *Geodia* | *barretti* (Bowerbank, 1858) | Vosmaer, 1882 |
| Family Theneidae (Carter, 1883) |  |  |  |  |  |
|  | *Thenea* | *valdiviae* (von Lendenfeld, 1907) | *Thenea* | *muricata* (Bowerbank, 1858) | Vosmaer, 1882, 1885; Hansen, 1885?; Koltun 1966? |
| Family Tetillidae (Sollas, 1886) |  |  |  |  |  |
|  | *Tetilla* | *polyura* (Schmidt, 1870) | *Tetilla* | *polyura* (Schmidt, 1870) | Vosmaer, 1885 |
|  | *Tetilla* | *sibirica*(Fristedt, 1887) | *Tethya* | *sibirica* (Fristedt, 1887) | Hentschel, 1929 |
|  | *Craniella* | zetlandica (Carter, 1872) | *Craniellopsis* | *zetlandica* (Carter, 1872) | Topsent, 1913 |
|  | *Craniella* | *cranium* (Müller, 1776) | *Craniella* | *muelleri* (Vosmaer, 1885) | Vosmaer, 1885 |
| Family Ancorinidae (Schmidt, 1870) |  |  |  |  |  |
|  | *Stelletta* | *normani* (Sollas, 1880) | *Stelletta* | *normani* (Sollas, 1880) | Koltun, 1966 |
|  | *Stelletta* | *rhaphidiophora* (Hentschel, 1929) | *Stelletta* | *rhaphidiophora* (Hentschel, 1929) | Hentschel, 1929 |
|  | *Stryphnus* | *fortis* (Vosmaer, 1885) | *Stelletta* | *fortis* (Vosmaer, 1885) | Vosmaer, 1885; Koltun, 1966 (as *Stryphnus ponde-rosus,* Bowerbank 1866)? |
| Order Tethyida (Van Soest et al., 2019)  Family Tethyidae (Gray, 1848) |  |  |  |  |  |
|  | *Tethya* | *aurantium* (Pallas, 1766) | *Tethya* | *lyncurium* (Linnaeus, 1767) | Vosmaer, 1885 |
|  | *Tethya* | *norvegica* (Bowerbank, 1872) | *Tethya* | *lyncurium* var. *obtusum* (Vosmaer, 1882) | Vosmaer, 1882; Koltun, 1966 (as *T. aurantium*, Pallas 1766)? |
| Order Biemnida (Morrow, 2013)  Family Biemnidae (Hentschel, 1923) |  |  |  |  |  |
|  | *Biemna* | *variantia* (Bowerbank, 1858) | *Gellius* | *gemmuliferus* (Breitfuss, 1912) | Breitfuss, 1912 |
| Order Poecilosclerida (Topsent, 1928)  Family Cladorhizidae (Dendy, 1922) |  |  |  |  |  |
|  | *Lycopodina* | *cupressiformis* (Carter, 1874) | *Asbestopluma* | *cupressiformis* (Carter, 1874) | Koltun, 1959 |
|  | *Lycopodina* | *lycopodium* (Levinsen, 1887) | *Asbestopluma* | *lycopodium* (Levinsen, 1887) | Koltun, 1959 |
|  | *Lycopodina* | *infundibulum* (Levinsen, 1887) | *Asbestopluma* | *infundibulum* (Levinsen, 1887) | Hentschel, 1929 |
|  | *Asbestopluma* | *pennatula* (Schmidt, 1875) | *Cladorhiza* | *bihamatifera* (Carter, 1876) | Vosmaer, 1882 |
|  | *Asbestopluma* | *bihamatifera* (Carter, 1876) | *Asbestopluma* | *bihamatifera* (Carter, 1876) | Hentschel, 1929 |
| Family Acarnidae (Dendy, 1922) |  |  |  |  |  |
|  | *Iophon* | *koltuni* (Morozov, 2019) | Iophon | *piceus dubius* (Koltun 1959) | Koltun, 1959 |
|  | *Iophon* | *frigidum* Lundbeck, 1909 | *Iophon* | *frigidus* (Lundbeck, 1909) | Breitfuss, 1912 |
|  | *Iophon* | *frigidum* var. *gracile* (Hentschel, 1929) | Iophon | *frigidus* var. *gracilis*(Hentschel, 1929) | Hentschel, 1929 |
|  | *Iophon* | *piceum* (Vosmaer, 1882) | *Alebion* | *piceum* (Vosmaer, 1882) | Vosmaer, 1882 |
|  | *Iophon* | *dubium* (Hansen, 1885) | *Raniera* | *dubia* (Hansen, 1885) | Hansen, 1885 |
|  | *Cornulum* | *textile* (Carter, 1876) | *Cornulum* | *textile* (Carter, 1876) | Koltun, 1959 |
| Family Coelosphaeridae (Dendy, 1922) |  |  |  |  |  |
|  | *Lissodendoryx* | *derjugini* (Breitfuss, 1912) | *Hymeraphia* | *derjugini* (Breitfuss, 1912) | Breitfuss, 1912 |
|  | *Lissodendoryx* | *sophia*(Fristedt, 1887) | *Lissodendoryx* | *sophia* (Fristedt, 1887) | Breitfuss, 1912 |
|  | *Lissodendoryx* | *fragilis*(Fristedt, 1885) | *Lissodendoryx* | *fragilis* (Fristedt, 1885) | Breitfuss, 1912 |
|  | *Lissodendoryx* | *lundbecki*(Topsent, 1913) | *Lissodendoryx* | *lundbecki* (Topsent, 1913) | Topsent, 1913 |
|  | *Lissodendoryx* | *oligacantha* (Hentschel, 1929) | *Ectyodoryx* | *oligacantha* (Hentschel, 1929) | Hentschel, 1929 |
|  | *Lissodendoryx* | *loyningi* (Burton, 1934) | *Ectyodoryx* | *loyningi* (Burton, 1934) | Koltun, 1959 |
|  | *Lissodendoryx* | *olgae* (Hentschel, 1929) | *Ectyodoryx* | *olgae* (Hentschel, 1929) | Hentschel, 1929 |
|  | *Lissodendoryx* | *complicata* (Hansen, 1885) | *Lissodendoryx* | *complicata* (Hansen, 1885) | Hentschel, 1929 |
|  | *Lissodendoryx* | *indistincta* (Fristedt, 1887) | *Lissodendoryx* | *indistincta* (Fristedt, 1887) | Breitfuss, 1912 |
|  | *Lissodendoryx* | *diversichela* (Lundbeck, 1905) | *Lissodendoryx* | *diversichela* (Lundbeck, 1905) | Koltun, 1959 |
|  | *Lissodendoryx* | *fragilis*(Fristedt, 1885) | *Lissodendoryx* | *fragilis*(Fristedt, 1885) | Koltun, 1959 |
|  | *Forcepia* | *forcipula* (Lundbeck, 1905) | *Esperiopsis* | *forcipula* (Lundbeck, 1905) | Hentschel, 1929 |
|  | *Forcepia* | *fabricans* (Schmidt, 1874) | *Forcipina* | *bulbosa* (Vosmaer, 1885) | Vosmaer, 1885 |
|  | *Forcepia* | *assimilis* (Lundbeck, 1910) | *Leptolabis* | *assimilis* (Lundbeck, 1910) | Koltun, 1959 |
|  | *Coelosphaera* | *physa* (Schmidt, 1875) | *Histoderma* | *physa* (Schmidt, 1875) | Breitfuss, 1912 |
|  | *Coelosphaera* | *tubifex* (Thomson, 1873) | *Coelosphaera* | *appendiculata* (Carter, 1874) | Koltun, 1959 |
| Family Crellidae (Dendy, 1922) |  |  |  |  |  |
|  | *Crella* | *brunnea*(Hansen, 1885) | *Myxilla* | *brunnea*(Hansen, 1885) | Hansen, 1885 |
|  | *Crella* | *pyrula*(Carter, 1876) | *Sclerilla* | *arctica* (Hansen, 1885) | Hansen, 1885 |
|  | *Crellomima* | *imparidens* (Rezvoi, 1925 ) | *Crellomima* | *imparidens* (Rezvoi, 1925 ) | Rezvoi, 1925 |
|  | *Crellomima* | *incrustans* (Hentschel, 1929) | *Crellomima* | *incrustans* (Hentschel, 1929) | Hentschel, 1929 |
|  | *Crellomima* | *derma* (Hentschel, 1929) | *Crellomima* | *derma* (Hentschel, 1929) | Hentschel, 1929 |
| Family Dendoricellidae (Hentschel, 1923) |  |  |  |  |  |
|  | *Dendoricella* | *flabelliformis* (Hansen, 1885) | *Homoeodictya* | *flabelliformis* (Hansen, 1885) | Rezvoi, 1928 |
| Family Esperiopsidae (Hentschel, 1923) |  |  |  |  |  |
|  | *Semisuberites* | *cribrosa* (Miklucho-Maclay, 1870) | *Veluspa* | *polymorpha* var. *infundibuliformis* (Miklucho-Maclay, 1870) | Miklucho-Maclay, 1870 |
|  | *Amphilectus* | *typichela* (Lundbeck, 1905) | *Esperiopsis* | *typichela* (Lundbeck, 1905) | Breitfuss, 1912 |
|  | *Amphilectus* | *digitatus* (Miklucho-Maclay, 1870) | *Veluspa* | *polymorpha* var. *digitata* (Miklucho-Maclay, 1870) | Miklucho-Maclay, 1870 |
|  | *Amphilectus* | *ovulum* (Schmidt, 1870) | *Mycale* | *ovulum* (Schmidt, 1870) | Hentschel, 1929 |
|  | *Esperiopsis* | *villosa*(Carter, 1874) | *Esperiopsis* | *villosa*(Carter, 1874) | Koltun, 1959 |
| Family Hymedesmiidae (Topsent, 1928) |  |  |  |  |  |
|  | *Hymedesmia* | *similis* (Lundbeck, 1910) | *Hymedesmia* | *similis* (Lundbeck, 1910) | Koltun, 1959 |
|  | *Hymedesmia* | *nummulus* (Lundbeck, 1910) | *Hymedesmia* | *nummulus* (Lundbeck, 1910) | Koltun, 1959 |
|  | *Hymedesmia* | *trichoma* (Lundbeck, 1910) | *Hymedesmia* | *trichoma* (Lundbeck, 1910) | Koltun, 1959 |
|  | *Hymedesmia* | *dermata* (Lundbeck, 1910) | *Hymedesmia* | *dermata* (Lundbeck, 1910) | Hentschel, 1929 |
|  | *Hymedesmia* | *paupertas* (Bowerbank, 1866) | *Hymedesmia* | *paupertas* (Bowerbank, 1866) | Koltun, 1959 |
|  | *Hymedesmia* | *storea* (Lundbeck, 1910) | *Hymedesmia* | *storea* (Lundbeck, 1910) | Rezvoi, 1928 |
|  | *Hymedesmia* | *procumbens* (Lundbeck, 1910) | *Hymedesmia* | *procumbens* (Lundbeck, 1910) | Koltun, 1959 |
|  | *Hymedesmia* | *baculifera* (Topsent, 1901) | *Hymedesmia* | *baculifera* (Topsent, 1901) | Hentschel, 1929 |
|  | *Hymedesmia* | *mamillaris* (Fristedt, 1885) | *Hastatus* | *mamillaris* (Fristedt, 1885) | Hentschel, 1929 |
|  | *Hymedesmia* | *occulta* (Bowerbank, 1869) | *Hymedesmia* | *occulta* (Bowerbank, 1874) | Koltun, 1959 |
|  | *Hymedesmia* | *truncata* (Lundbeck, 1910) | *Hymedesmia* | *truncata* (Lundbeck, 1910) | Hentschel, 1929 |
|  | *Phorbas* | *dendyi* (Topsent, 1890) | *Anchinoe* | *dendyi* (Topsent, 1890) | Hentschel, 1929 |
|  | *Phorbas* | *roemeri*(Hentschel, 1929) | *Anchinoe* | *roemeri*(Hentschel, 1929) | Hentschel, 1929 |
|  | *Phorbas* | *perarmatus* (Bowerbank, 1866) | *Anchinoe* | *arneseni* (Topsent, 1913) | Koltun, 1959 |
|  | *Hemimycale* | *rhodus* (Hentschel, 1929) | *Hymedesmia* | *rhodus* (Hentschel, 1929) | Hentschel, 1929 |
|  | *Plocamionida* | *ambigua* (Bowerbank, 1866) | *Hastatus* | *ambiguus* (Bowerbank, 1866) | Fristedt, 1887 |
| Family Isodictyidae (Dendy, 1924) |  |  |  |  |  |
|  | *Isodictya* | *palmata* (Ellis & Solander, 1786) | *Pachychalina* | *caulifera*(Vosmaer, 1882) | Vosmaer, 1882 |
| Family Mycalidae (Lundbeck, 1905) |  |  |  |  |  |
|  | *Mycale* | *thaumatochela* (Lundbeck, 1905) | *Mycale* | *thaumatochela* (Lundbeck, 1905) | Rezvoi, 1924 |
|  | *Mycale* | *lingua* (Bowerbank, 1866) | *Esperia* | *lingua* (Bowerbank, 1866) | Vosmaer, 1885 |
|  | *Mycale* | *intermedia* (Schmidt, 1874) | *Oxymycale* | *intermedia* (Schmidt, 1874) | Koltun, 1959 |
|  | *Rhaphidotheca* | *arctica* (Hentschel, 1929) | *Rhaphidotheca* | *arctica* (Hentschel, 1929) | Hentschel, 1929 |
| Family Myxillidae (Dendy, 1922) |  |  |  |  |  |
|  | *Myxilla* | *fimbriata* (Bowerbank, 1866) | *Myxilla* | *fimbriata* (Bowerbank, 1866) | Breitfuss, 1912 |
|  | *Myxilla* | *brunnea* (Hansen, 1885) | *Myxilla* | *brunnea* (Hansen, 1885) | Hansen, 1885 |
|  | *Myxilla* | *incrustans* (Johnston, 1842) | *Myxilla* | *incrustans* (Johnston, 1842) | Hentschel, 1929 |
|  | *Myxilla* | *perspinosa* (Lundbeck, 1905) | *Myxilla* | *perspinosa* (Lundbeck, 1905) | Hentschel, 1929 |
|  | *Myxilla* | *flexitornota* (Rezvoi, 1925) | *Myxilla* | *flexitornota* (Rezvoi, 1925) | Rezvoi, 1925 |
|  | *Melonanchora* | *elliptica* (Carter, 1874) | *Melonanchora* | *elliptica* (Carter, 1874) | Vosmaer, 1885 |
| Family Tedaniidae (Ridley & Dendy, 1886) |  |  |  |  |  |
|  | *Tedania* | *suctoria* (Schmidt, 1870) | *Tedania* | *suctoria* (Schmidt, 1870) | Vosmaer, 1882 |
| Family Microcionidae (Carter, 1875) |  |  |  |  |  |
|  | *Artemisina* | *arcigera* (Schmidt, 1870) | *Artemisina* | *suberitoides*(Vosmaer, 1885) | Vosmaer, 1885 |
|  | *Artemisina* | *lundbecki* (Morozov, 2019) | *Artemisina* | *apollinis* (Ridley & Dendy, 1886) | Hentschel, 1929 |
|  | *Antho* | *arctica* (Koltun, 1959) | *Plocamia* | *arctica* (Koltun, 1959) | Koltun, 1959 |
|  | *Antho* | *dichotoma* (Linnaeus, 1767) | *Clathria* | *dichotoma* (Esper, 1794) | Koltun, 1959 |
|  | *Clathria* | *heterotoxa* (Hentschel, 1929) | *Microciona* | *heterotoxa* (Hentschel, 1929) | Koltun, 1959 |
|  | *Clathria* | *barleei* (Bowerbank, 1866) | *Esperiopsis* | *foliata* (Bowerbank, 1874) | Breitfuss, 1912 |
|  | *Clathria* | *robusta* (Koltun, 1959) | *Clathria* | *robusta* (Koltun, 1959) | Koltun, 1959 |
|  | *Clathrina* | *blanca* (Miklucho-Maclay, 1868) | *Leucosolenia* | *blanca* (Miklucho-Maclay, 1868) | Breitfuss, 1896 |
|  | *Clathrina* | *coriacea* (Montagu, 1814) | *Leucosolenia* | *coriacea* (Montagu, 1814) | Breitfuss, 1912 |
| Family Latrunculiidae (Topsent, 1922) |  |  |  |  |  |
|  | *Bomba* | *tricincta* (Hentschel, 1929) | *Latrunculia* | *tricincta* (Hentschel, 1929) | Hentschel, 1929 |
|  | *Latrunculia* | *triloba* (Schmidt, 1875) | *Latrunculia* | *triloba* (Schmidt, 1875) | Hentschel, 1929 |
| Family Chondropsidae (Carter, 1886) |  |  |  |  |  |
|  | *Psammoclema* | *finmarchicum* (Hentschel, 1929) | *Psammopemma* | *finmarchicum* var. *spiculosa* (Hentschel, 1929) | Hentschel, 1929 |
| Oreder Bubarida (Morrow & Cárdenas, 2015)   Family Bubaridae (Topsent, 1894) |  |  |  |  |  |
|  | *Bubaris* | *vermiculata* (Bowerbank, 1866) | *Bubaris* | *vermiculata* (Bowerbank, 1866) | Topsent, 1913; Koltun, 1959 (as *Axinella vermiculata*, Bowerbank 1866)? |
| Family Dictyonellidae (van Soest,   Diaz & Pomponi, 1990) |  |  |  |  |  |
|  | *Acanthella* | *erecta* (Carter, 1876) | Axinella | *vermiculata* var. *erecta* (Carter, 1876) | Fristedt, 1887 |
|  | *Acanthella* | *multiformis* (Vosmaer, 1885) | *Acanthella* | *multiformis* (Vosmaer, 1885) | Vosmaer, 1885 |
| Order Merliida (Vacelet, 1979)  Family Hamacanthidae (Gray, 1872) |  |  |  |  |  |
|  | *Hamacantha* | *papillata* (Vosmaer, 1885) | *Hamacantha* | *papillata* (Vosmaer, 1885) | Vosmaer, 1885 |
| Order Clionaida (Morrow, Cárdenas, 2015)  Family Clionaidae (d'Orbigny, 1851) |  |  |  |  |  |
|  | *Pione* | *vastifica* (Hancock, 1849) | Cliona | *vastifica* (Hancock, 1849) | Koltun, 1966 |
| Subclass Keratosa (Grant, 1861)  Order Dendroceratida (Minchin, 1900)  Family Dictyodendrillidae (Bergquist, 1980) |  |  |  |  |  |
|  | *Spongionella* | *pulchella* (Sowerby, 1804) | *Cacospongia* | *schmidtii* (Marenzeller, 1878) | Marenzeller, 1878 |
| Order Dictyoceratida (Minchin, 1900)  Family Dysideidae (Gray, 1867) |  |  |  |  |  |
|  | *Dysidea* | *avara*(Schmidt, 1862) | *Spongelia* | *avara* (Schmidt, 1862) | Vosmaer, 1885 |
|  | *Dysidea* | *fragilis* (Montagu, 1814) | *Dysidea* | *fragilis* (Montagu, 1814) | Koltun, 1959 |
| Family (Irciniidae Gray, 1867) |  |  |  |  |  |
|  | *Ircinia* | *variabilis* (Schulze, 1880) | *Hircinia* | *variabilis* (Schulze, 1880) | Koltun, 1959 |
| Subclass Verongimorpha (Erpenbeck et al., 2012)  Order Chondrillida (Redmond et al., 2013)  Family Halisarcidae (Schmidt, 1862) |  |  |  |  |  |
|  | *Halisarca* | *dujardinii*(Johnston, 1842) | *Halisarca* | *schulzei* (Merejkowsky, 1878) | Breitfuss, 1912 |
| Order Verongiida (Bergquist, 1978)  Family Ianthellidae (Hyatt, 1875) |  |  |  |  |  |
|  | *Hexadella* | *dedritifera* (Topsent, 1913) | *Hexadella* | *dedritifera* (Topsent, 1913) | Topsent, 1913 |
